# Supplementary material for: Label-free fluorometric assay for acetylcholinesterase and inhibitor screening based on supramolecular assemblies
Source: Royal Society of Chemistry journal article supplement (doi:10.1039/c3ay41007b), 2013-01-01
Supplement: c3ay41007b.pdf [file c3ay41007b.pdf]

## Electronic Supplementary Information

### Label-free Fluorometric Assay for Acetylcholinesterase and Inhibitor Screening Based on Supramolecular Assemblies

Lan Jia\* Jun Pan Jingxin Zhu

Key laboratory of interface science and engineering in advanced materials, ministry of education, College of Material Science and Engineering, Taiyuan University of Technology, Taiyuan, 030024, P. R. China

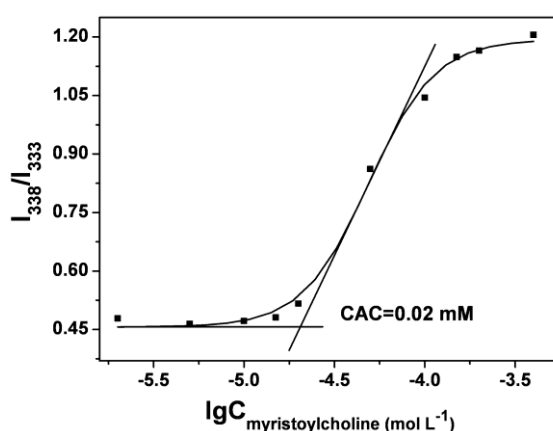

**Figure S1** CAC plot of myristoylcholine in myristoylcholine-heparin assemblies with the fixed ratio of [myristoylcholine] : [Heparin] = 0.2 mM : 0.04 mg mL<sup>-1</sup>.

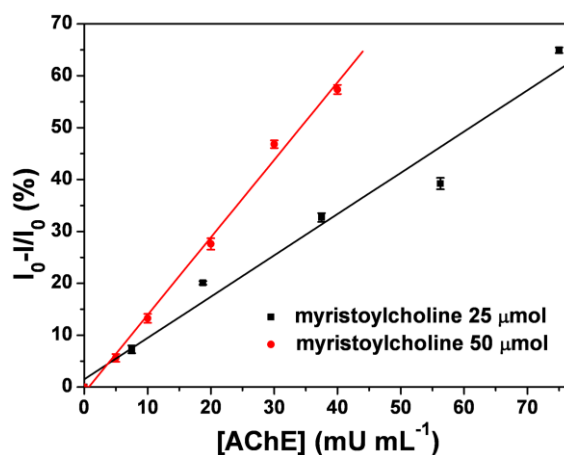

**Figure S2** The calibration curves corresponding to the analysis of AChE with different concentrations of substrate.

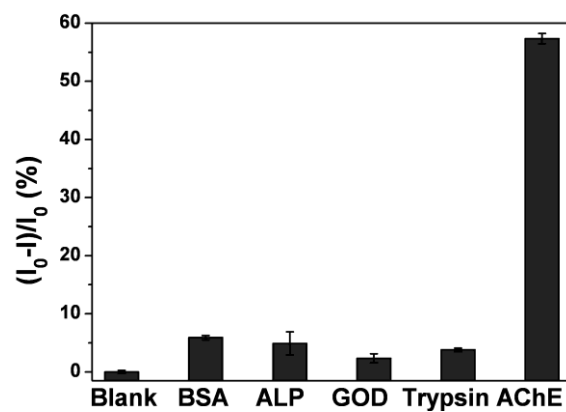

**Figure S3** The relative fluorescence decrease percentage of emission intensity at 393 nm with different enzymes. The concentration of all the enzyme was 40 mU mL<sup>-1</sup>.
